# Supplementary material for: One-Step Synthesis of High Pure Tris(8-hydroxyquinoline)aluminum for Optics and Photonics
Source: MDPI journal article supplement (doi:10.3390/ma15030734), 2022-01-19
Supplement: s1 [file s1]

Supplementary

# One-step Synthesis of High Pure Tris(8-oxyquinoline)aluminum For Optics And Photonics

Roman Avetisov, Ksenya Kazmina, Artem Barkanov, Marina Zykova, Andrew Khomyakov, Alexander Pytchenko and Igor Avetissov

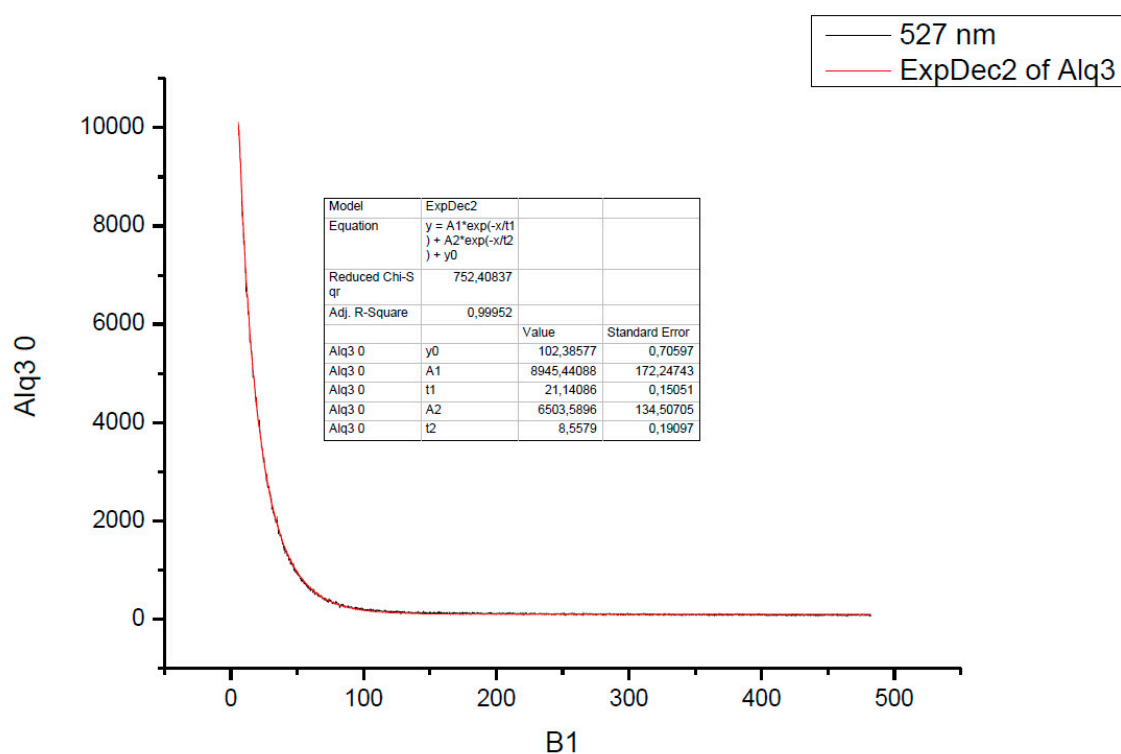

**Figure S1.** PL decay kinetics at 527 nm for the Alq3 preparation obtained by the «wet» synthesis as described in Ref. [Avetissov, I. C.; Akkuzina, A. A.; Avetisov, R. I.; Khomyakov, A. V.; Saifutayarov, R. R. Non-Stoichiometry of Tris(8- Hydroxyquinoline) Aluminium: Is It Possible? CrystEngComm 2016, 18 (12), 2182–2188. <https://doi.org/10.1039/C6CE00011H>.].

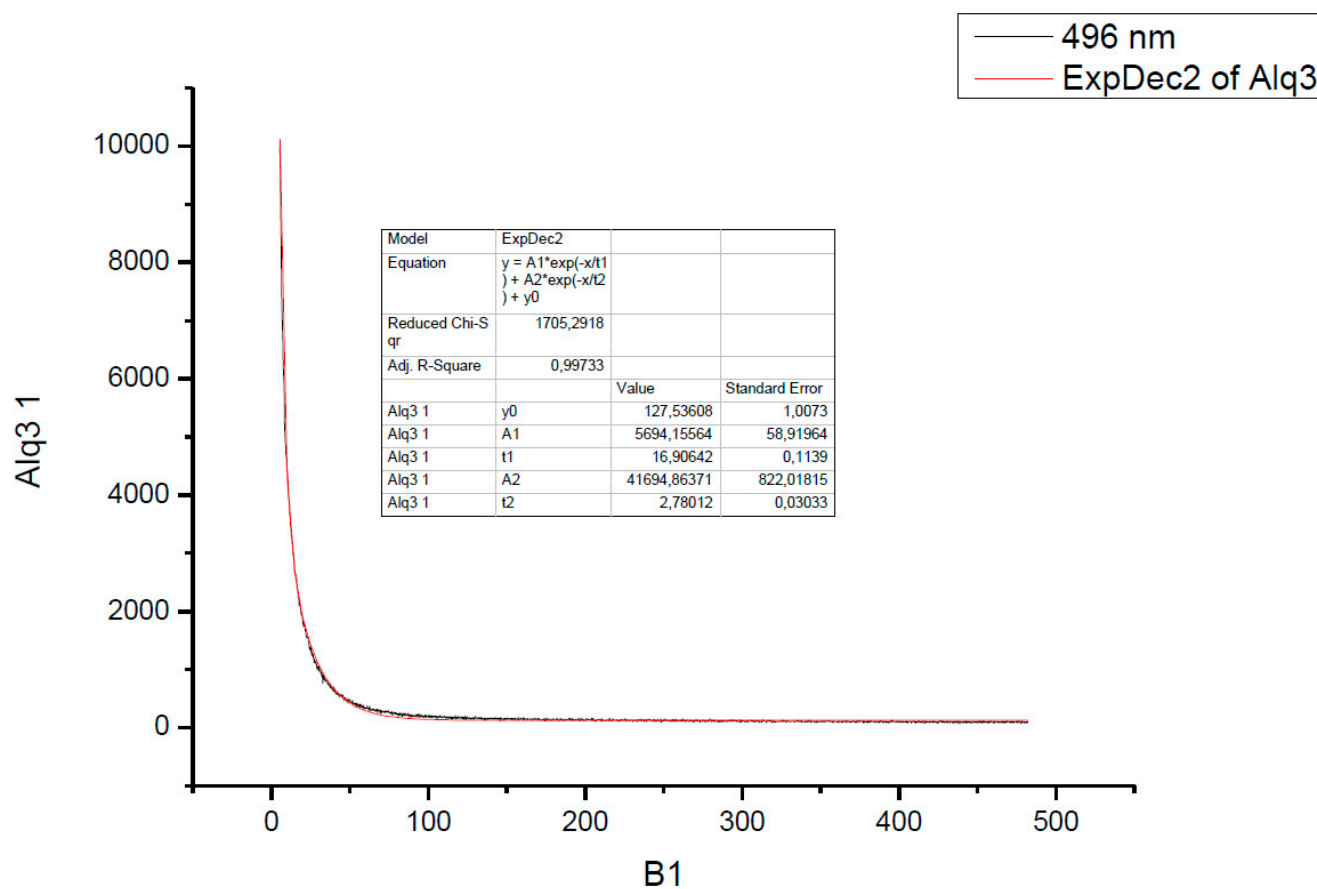

**Figure S2.** PL decay kinetics at 496 nm for the Alq3 preparation (N1) obtained by the direct synthesis.

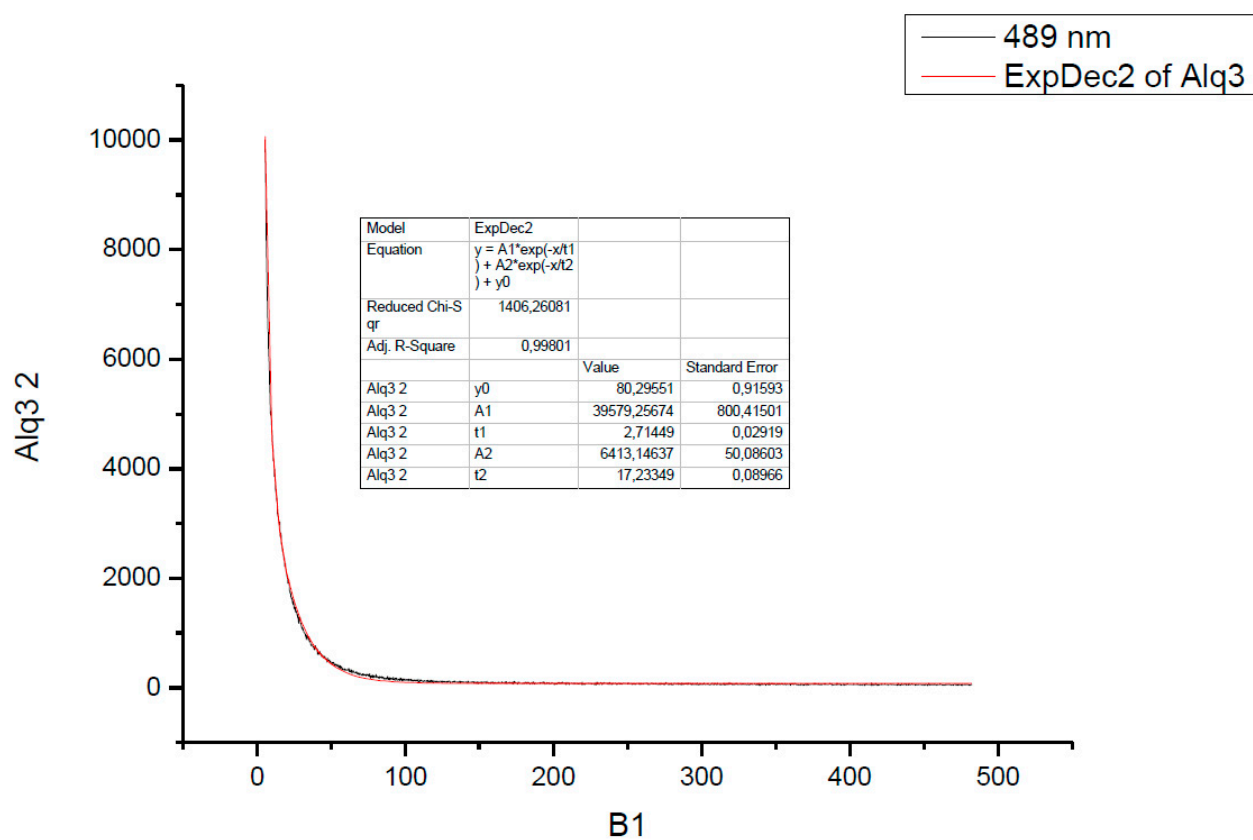

**Figure S3.** PL decay kinetics at 489 nm for the Alq3 preparation (N2) obtained by the direct synthesis.

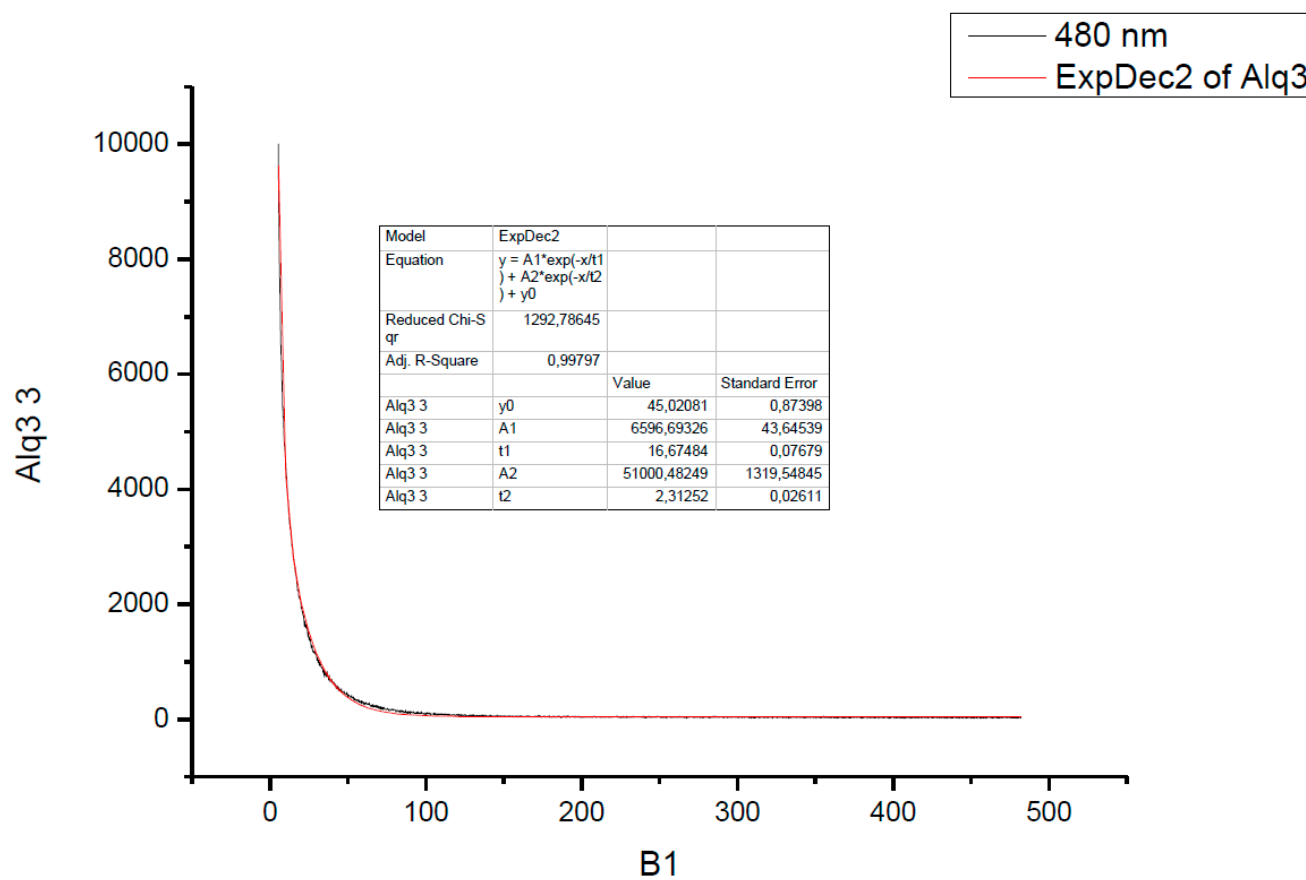

**Figure S4.** PL decay kinetics at 480 nm for the Alq3 preparation (N3) obtained by the direct synthesis.

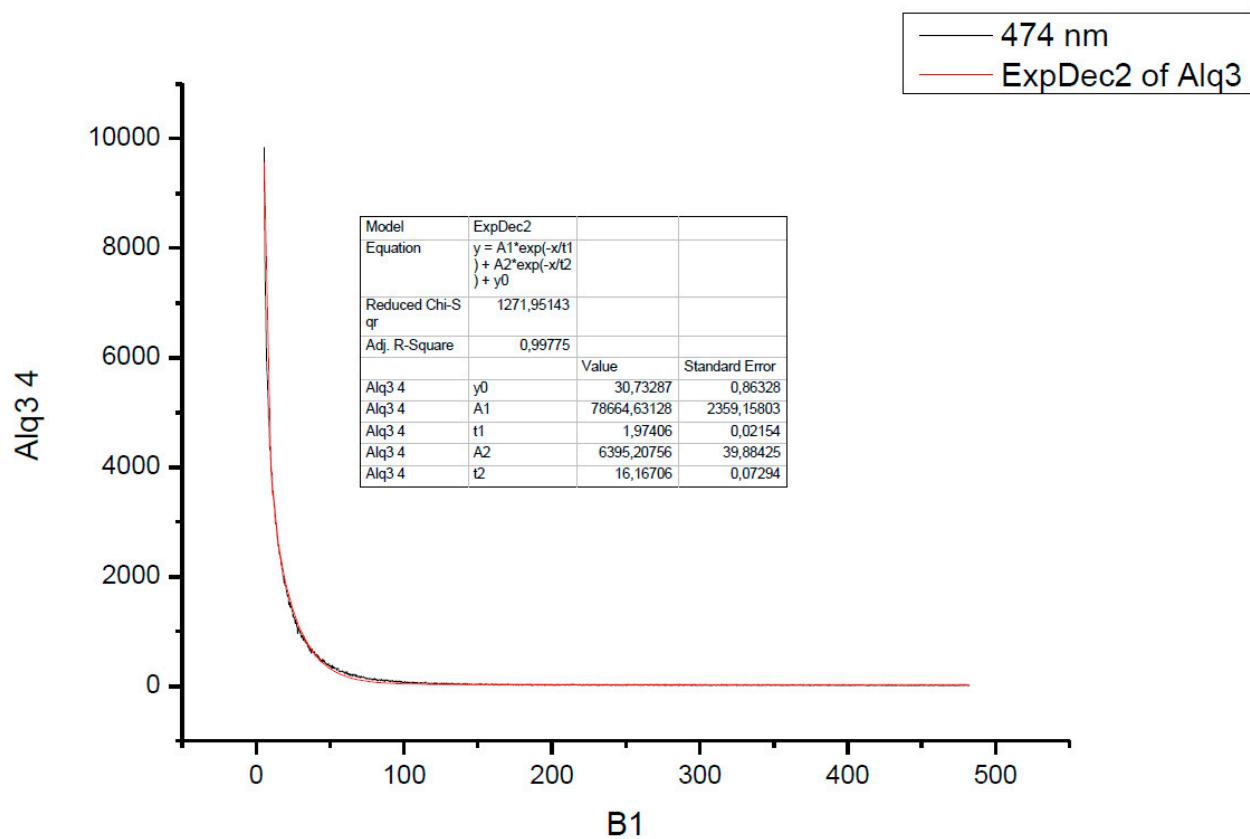

**Figure S5.** PL decay kinetics at 474 nm for the Alq3 preparation (N4) obtained by the direct synthesis.
